# Supplementary material for: Tracking B Cell Memory to SARS-CoV-2 Using Rare Cell Analysis System
Source: MDPI journal article supplement (doi:10.3390/vaccines11040735), 2023-03-26

**Table S1. Anti-spike-RBD binding antibody validation data by ELISA**

| Specimen Basic Information |                  | Raw Data |        |        |            | Results        |         |
|----------------------------|------------------|----------|--------|--------|------------|----------------|---------|
| Specimen                   | Concentration    | Dilution | 450 nm | 620 nm | 450-620 nm | Diluted BAU/mL | BAU/mL  |
| Negative control           | -                | -        | 0.000  | 0.000  | 0.000      | -              | -       |
| WHO IS 20/136 -01          | 80 BAU/mL        | -        | 1.300  | 0.000  | 1.300      | -              | -       |
| WHO IS 20/136 -02          | 40 BAU/mL        | -        | 1.284  | 0.000  | 1.284      | -              | -       |
| WHO IS 20/136 -03          | 20 BAU/mL        | -        | 1.208  | 0.001  | 1.207      | -              | -       |
| WHO IS 20/136 -04          | 10 BAU/mL        | -        | 1.050  | 0.001  | 1.049      | -              | -       |
| WHO IS 20/136 -05          | 5 BAU/mL         | -        | 0.981  | 0.000  | 0.981      | -              | -       |
| WHO IS 20/136 -06          | 2.5 BAU/mL       | -        | 0.907  | 0.001  | 0.906      | -              | -       |
| WHO IS 20/136 -07          | 1.25 BAU/mL      | -        | 0.669  | 0.000  | 0.669      | -              | -       |
| WHO IS 20/136 -08          | 0.625 BAU/mL     | -        | 0.389  | 0.001  | 0.388      | -              | -       |
| WHO IS 20/150              | High             | 1:400    | 0.818  | 0.000  | 0.818      | 2.077          | 830.8   |
| WHO IS 20/148              | Mid              | 1:100    | 0.905  | 0.000  | 0.905      | 2.407          | 240.7   |
| WHO IS 20/142              | Negative control | 1:400    | 0.047  | 0.000  | 0.047      | <0.625         | -       |
| WHO IS 20/136 -09          | 2.5 BAU/mL       | -        | 1.141  | 0.002  | 1.139      | -              | -       |
| WHO IS 20/136 -10          | 1.25 BAU/mL      | -        | 0.670  | 0.002  | 0.668      | -              | -       |
| WHO IS 20/136 -11          | 0.625 BAU/mL     | -        | 0.398  | 0.000  | 0.398      | -              | -       |
| 20/150                     | High             | 1:400    | 1.150  | 0.002  | 1.148      | 2.504          | 1001.47 |
| 20/148                     | Mid              | 1:100    | 0.987  | 0.001  | 0.986      | 2.093          | 209.28  |
| 20/142                     | Negative control | 1:400    | 0.023  | 0.000  | 0.023      | <0.625         | -       |
| Negative control           | -                | -        | 0.002  | 0.000  | 0.002      | -              | -       |
| WHO IS 20/136 -12          | 2.5 BAU/mL       | -        | 0.968  | -0.007 | 0.975      | -              | -       |
| WHO IS 20/136 -13          | 1.25 BAU/mL      | -        | 0.663  | -0.007 | 0.67       | -              | -       |
| WHO IS 20/136 -14          | 0.625 BAU/mL     | -        | 0.375  | -0.006 | 0.381      | -              | -       |
| 20/150                     | High             | 1:400    | 0.862  | 0.002  | 0.861      | 2.063          | 825.07  |
| 20/148                     | Mid              | 1:100    | 0.817  | 0.000  | 0.817      | 1.92           | 191.97  |
| 20/142                     | Negative control | 1:400    | 0.109  | -0.002 | 0.111      | <0.625         | -       |

**Table S2. Anti-spike-RBD neutralizing antibody validation data by ELISA**

| Specimen Basic Information |                  | Raw Data |        |        |            | Results       |         |
|----------------------------|------------------|----------|--------|--------|------------|---------------|---------|
| Specimen                   | Concentration    | Dilution | 450 nm | 620 nm | 450-620 nm | Diluted IU/mL | IU/mL   |
| Negative control           | -                | -        | 1.594  | 0.000  | 1.594      | -             | -       |
| WHO IS 20/136 -01          | 80 IU/mL         | -        | 0.029  | 0.000  | 0.029      | -             | -       |
| WHO IS 20/136 -02          | 40 IU/mL         | -        | 0.566  | 0.000  | 0.566      | -             | -       |
| WHO IS 20/136 -03          | 20 IU/mL         | -        | 0.873  | 0.000  | 0.873      | -             | -       |
| WHO IS 20/136 -04          | 10 IU/mL         | -        | 1.045  | 0.000  | 1.045      | -             | -       |
| WHO IS 20/136 -05          | 5 IU/mL          | -        | 1.278  | 0.000  | 1.278      | -             | -       |
| WHO IS 20/136 -06          | 2.5 IU/mL        | -        | 1.365  | 0.000  | 1.365      | -             | -       |
| WHO IS 20/136 -07          | 1.25 IU/mL       | -        | 1.541  | 0.000  | 1.541      | -             | -       |
| WHO IS 20/136 -08          | 0.625 IU/mL      | -        | 1.599  | 0.001  | 1.598      | -             | -       |
| WHO IS 20/150              | High             | 1:100    | 0.982  | 0.000  | 0.982      | 13.64         | 1364    |
| WHO IS 20/148              | Mid              | 1:20     | 0.923  | 0.000  | 0.923      | 17.21         | 344.2   |
| WHO IS 20/142              | Negative control | 1:100    | 1.561  | 0.000  | 1.561      | <10           | -       |
| Negative control           | -                | -        | 1.59   | -0.01  | 1.60       | -             | -       |
| WHO IS 20/136 -09          | 40 IU/mL         | -        | 0.28   | -0.01  | 0.29       | -             | -       |
| WHO IS 20/136 -10          | 20 IU/mL         | -        | 0.81   | -0.01  | 0.82       | -             | -       |
| WHO IS 20/136 -11          | 10 IU/mL         | -        | 1.08   | -0.01  | 1.09       | -             | -       |
| 20/150                     | High             | 1:100    | 1.04   | -0.01  | 1.05       | 12.012        | 1201.2  |
| 20/148                     | Mid              | 1:10     | 0.74   | -0.01  | 0.75       | 23.206        | 232.057 |
| 20/148                     | Mid              | 1:15     | 1.02   | -0.01  | 1.03       | 12.538        | 188.063 |
| 20/142                     | Negative control | 1:100    | 1.69   | -0.01  | 1.70       | <10           | -       |
| Negative control           | -                | -        | 1.84   | 0.00   | 1.84       | -             | -       |
| WHO IS 20/136 -12          | 40 IU/mL         | -        | 0.54   | 0.00   | 0.54       | -             | -       |
| WHO IS 20/136 -13          | 20 IU/mL         | -        | 1.12   | 0.00   | 1.12       | -             | -       |
| WHO IS 20/136 -14          | 10 IU/mL         | -        | 1.48   | 0.00   | 1.48       | -             | -       |
| 20/150                     | High             | 1:100    | 1.29   | 0.00   | 1.29       | 15.458        | 1545.81 |
| 20/148                     | Mid              | 1:10     | 1.15   | 0.00   | 1.15       | 20.039        | 200.387 |
| 20/148                     | Mid              | 1:15     | 1.38   | 0.00   | 1.38       | 12.435        | 186.532 |
| 20/142                     | Negative control | 1:100    | 1.72   | 0.00   | 1.72       | <10           | -       |
| Negative control           | -                | -        | 2.28   | 0.01   | 2.27       | -             | -       |
| WHO IS 20/136 -15          | 40 IU/mL         | -        | 0.83   | 0.04   | 0.79       | -             | -       |
| WHO IS 20/136 -16          | 20 IU/mL         | -        | 1.51   | 0.00   | 1.51       | -             | -       |
| WHO IS 20/136 -17          | 10 IU/mL         | -        | 2.00   | 0.01   | 1.99       | -             | -       |
| 20/150                     | High             | 1:100    | 1.62   | 0.01   | 1.61       | 18.787        | 1878.68 |
| 20/148                     | Mid              | 1:10     | 1.22   | 0.01   | 1.21       | 28.82         | 288.201 |
| 20/148                     | Mid              | 1:15     | 1.62   | 0.00   | 1.62       | 18.682        | 280.228 |
| 20/142                     | Negative control | 1:100    | 2.00   | 0.00   | 2.00       | <10           | -       |

**Table S3. Demographic Information for vaccinated SARS-CoV-2 naïve subjects**

Number of individuals, n (%)

|              |           |           |           |            |
|--------------|-----------|-----------|-----------|------------|
| Prime dose   | AZD1222   | BNT162b2  | mRNA-1273 | AZD1222    |
| Second dose  | AZD1222   | BNT162b2  | mRNA-1273 | mRNA-1273  |
| Total number | n= 14     | n= 10     | n= 8      | n= 3       |
| Male         | 9 (64.3%) | 6 (60.0%) | 6 (75.0%) | 3 (100.0%) |
| Female       | 5 (35.7%) | 4 (40.0%) | 2 (25.0%) | 0 (0%)     |

**Table S4. Reagents used for ELISA and spike-RBD specific memory B cells detection**

| Reagent                                                         | Vendor                 | Identifier      | Concentration / dilution |
|-----------------------------------------------------------------|------------------------|-----------------|--------------------------|
| <b>Part I: Neutralizing antibody ELISA assay</b>                |                        |                 |                          |
| ELISA Buffer kit                                                | TONBO biosciences      | 41-9245-KIT     |                          |
| Recombinant SARS-CoV-2 Spike RBD                                | R&D Systems            | 10500-CV-100    | 100 ng                   |
| ACE2 (Human) Recombinant Protein                                | Abnova                 | P6639           | 50 ng                    |
| LYNX Rapid HRP antibody conjugation kit                         | BIO-RAD                | LNK006P         | 40 µg                    |
| WHO International Standard for anti-SARS-CoV-2 immunoglobulin   | NIBSC                  | 20/136          | 1000 IU/mL               |
| WHO International Reference Panel for anti-SARS-CoV-2 immunoglo | NIBSC                  | 20/268          |                          |
| <b>Part II: Binding antibody ELISA assay</b>                    |                        |                 |                          |
| ELISA Buffer kit                                                | TONBO biosciences      | 41-9245-KIT     |                          |
| Recombinant SARS-CoV-2 Spike RBD                                | R&D Systems            | 10500-CV-100    | 100 ng                   |
| HRP Donkey anti-human IgG                                       | BioLegend              | 410902          | 1:20000                  |
| Anti-SARS-CoV-2 Spike Glycoprotein S1 antibody CR3022           | abcam                  | ab273073        | 10 µg/mL, 1:10           |
| WHO International Standard for anti-SARS-CoV-2 immunoglobulin   | NIBSC                  | 20/136          | 1000 BAU/mL              |
| WHO International Reference Panel for anti-SARS-CoV-2 immunoglo | NIBSC                  | 20/268          |                          |
| <b>Part III: Spike-RBD specific cell dectecting</b>             |                        |                 |                          |
| Recombinant SARS-CoV-2 Spike RBD                                | R&D Systems            | 10500-CV-100    | 0.5 µg                   |
| Recombinant SARS-CoV-2 B.1.1.529 Spike RBD                      | R&D Systems            | 11056-CV-100    | 0.5 µg                   |
| DAPI                                                            |                        |                 | 1:50                     |
| PerCP anti-human CD19                                           | BioLegend              | 392510          | 1:30                     |
| FITC anti-human CD27                                            | BioLegend              | 356404          | 1:30                     |
| Rabbit Anti-Human IgG                                           | Jackson ImmunoResearch | 309-001-008     | 1:100                    |
| Qdot800 anti-Rabbit IgG                                         | Invitrogen             | Q-11471MP       | 1:100                    |
| APC anti-human CD3                                              | BioLegend              | 317318          | 1:50                     |
| DyLight 550 Conjugation Kit                                     | abcam                  | AB201800-3X10UG |                          |

Figure S1

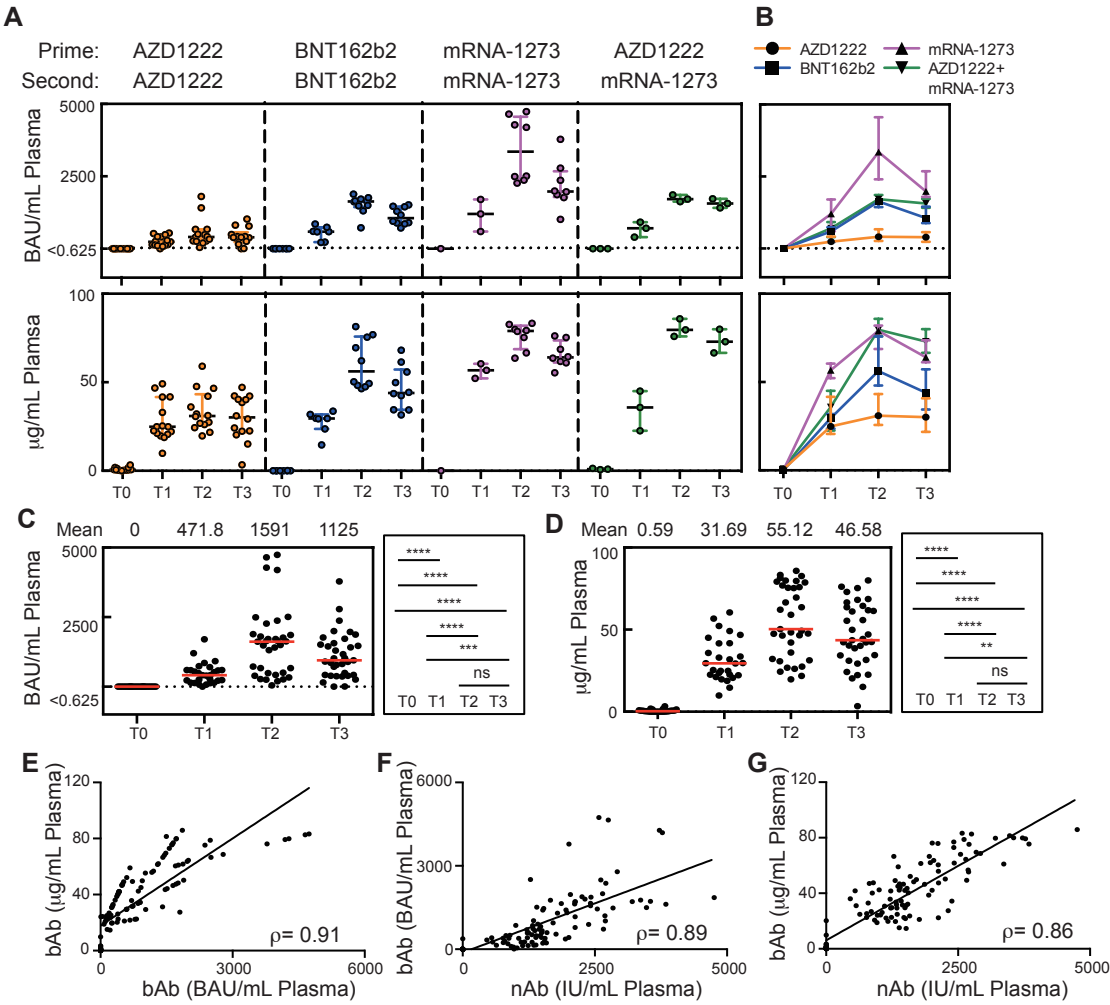

Figure S2

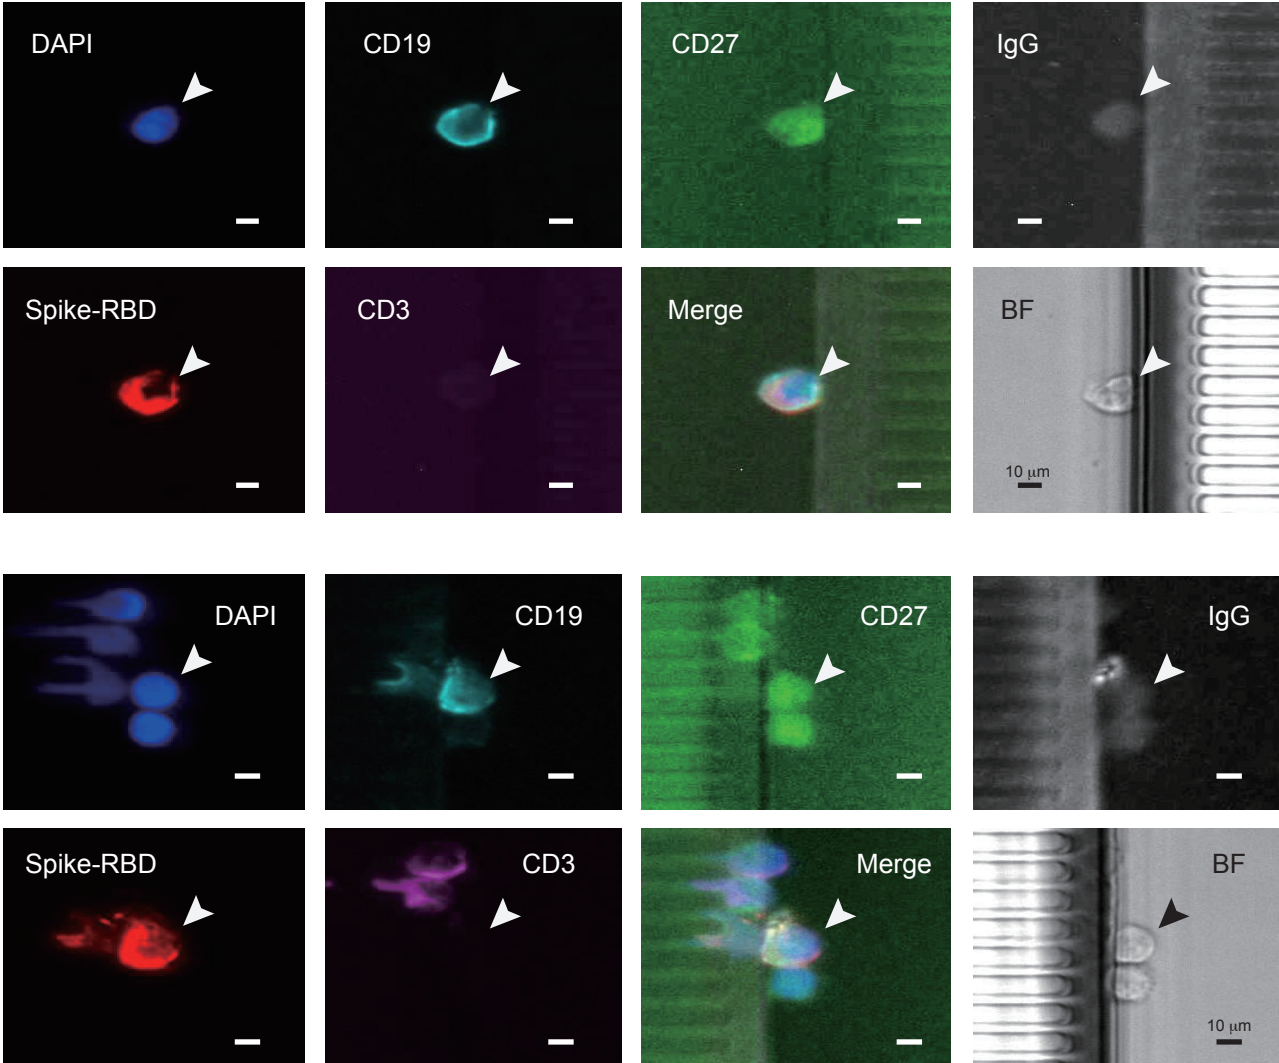

Figure S3

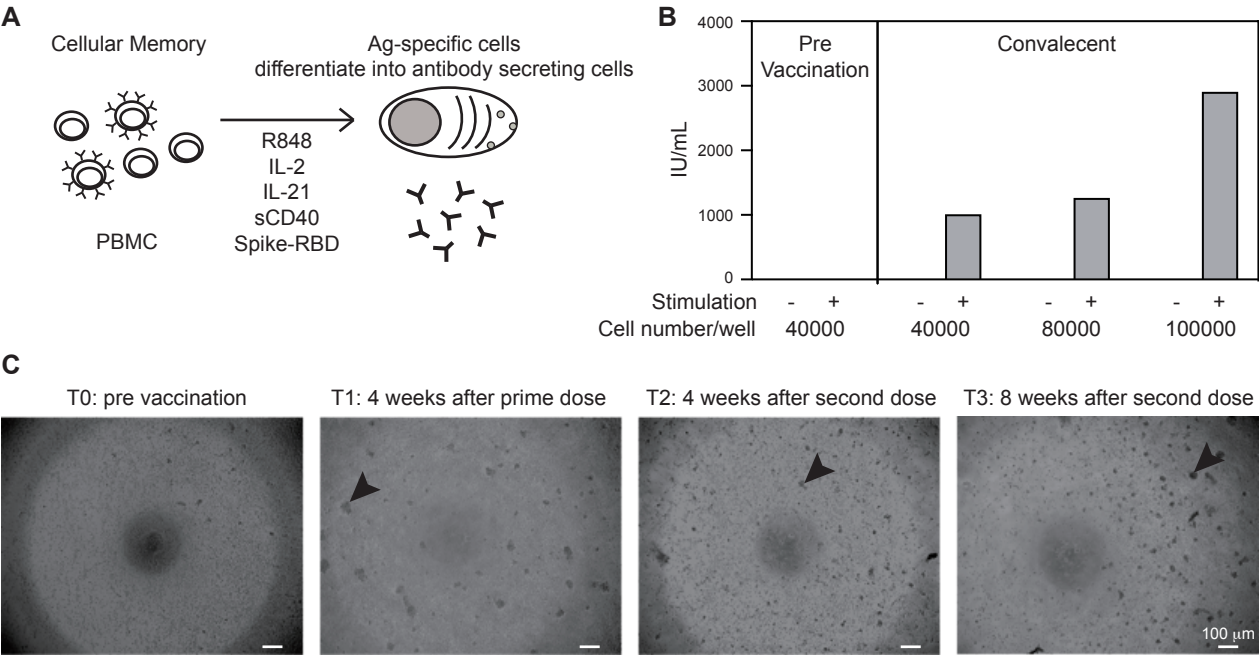

Figure S4

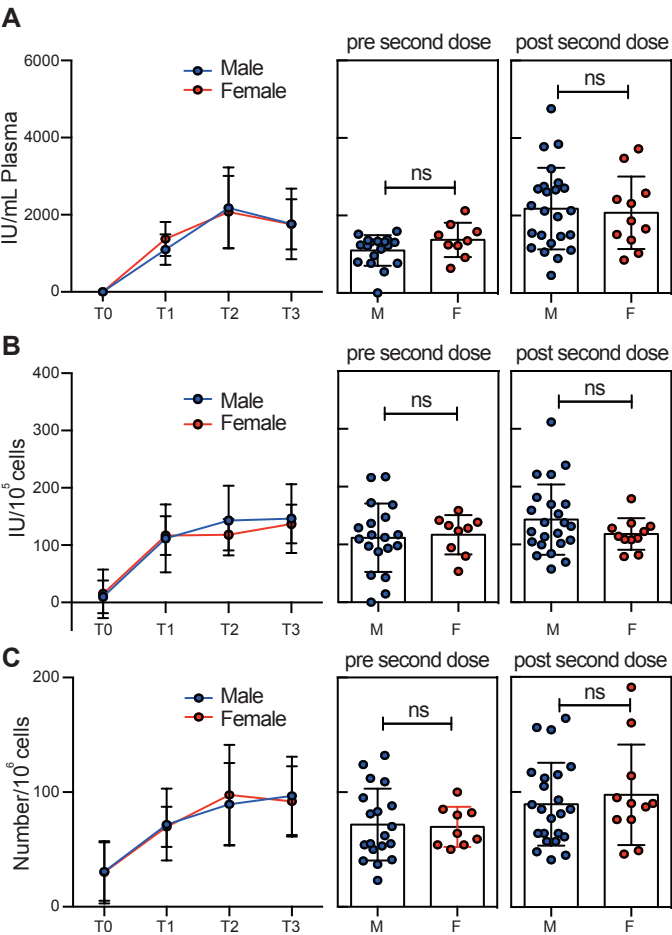

Supplement: s1 [file s1]
